# Supplementary material
Source: PubMed Central journal article supplement (PMC3286563)
Supplement: 11606_2011_1871_MOESM1_ESM.pdf [file 11606_2011_1871_MOESM1_ESM.pdf]

**VTE PROPHYLAXIS**

***If patient not expected to be ambulating in 24 hrs AND age > 40 OR has risks for VTE (e.g. cancer), use SCDs + pharmacologic agent***

- Order CBC Q 48 hrs if enoxaparin or heparin ordered
- Consult anticoagulation service (443-4023) if pt at risk for VTE, cannot walk, and cannot receive enoxaparin or heparin.

- Patients with epidural catheters: discontinue all low molecular-weight heparin**
- Sequential Compression Devices (SCDs) except while patient is walking
- Enoxaparin 40mg SQ daily (*recommended for most adult patients, **Contraindicated if epidural in place***)
  - For postoperative patients, first dose 8 hrs after arrival from OR to PACU (or ICU).
- Enoxaparin 30 mg SQ Q 12 hrs (*patients with abdominopelvic cancer, high risk patients, **Contraindicated if epidural in place***) \_\_\_\_\_
  - For postoperative patients, first dose at HH : MM  today  tomorrow (*check today or tomorrow, first dose should be 6-24 hrs after surgery*)
- Heparin 5000 units SQ Q 8 hrs (*recommended if epidural, creatinine >2, wt >150kg, CrCl <30*)
- Patient not eligible for enoxaparin or heparin prophylaxis (reason below)
  - CNS procedure/drain  Low-risk pt (age<40, ambulatory)  Active bleed  OTHER: \_\_\_\_\_

Signature \_\_\_\_\_ Provider No. \_\_\_\_\_ Date \_\_\_\_\_ Time \_\_\_\_\_ Pager \_\_\_\_\_

**ORDERS MUST INCLUDE LEGIBLE PROVIDER NUMBER, DATE, AND TIME**

Orders checked by \_\_\_\_\_ R.N. Date \_\_\_\_\_ Time \_\_\_\_\_
